# Supplementary material for: Cosmetic Reconstruction of Frontotemporal Depression Using Polyethylene Implant after Pterional Craniotomy
Source: Hindawi journal article supplement (doi:10.1155/2018/1982726), 2018-10-21
Supplement: f1 [file 1982726.f1.zip]

## Supplementary Materials

**S1 Table. The ratio of temporalis muscle thickness and volume of 92 patients**

| Number | T-1  | T-2  | V-1  | V-2  |
|--------|------|------|------|------|
| 1      | 0.49 | 1.26 | 0.77 | 1.09 |
| 2      | 0.39 | 0.73 | 0.88 | 1.31 |
| 3      | 0.77 | 1.40 | 1.18 | 1.24 |
| 4      | 0.29 | 0.63 | 0.54 | 1.07 |
| 5      | 0.40 | 1.05 | 0.73 | 1.13 |
| 6      | 0.64 | 1.20 | 0.69 | 1.24 |
| 7      | 0.22 | 0.86 | 0.78 | 1.62 |
| 8      | 0.45 | 1.06 | 0.53 | 1.37 |
| 9      | 0.44 | 0.86 | 0.62 | 0.88 |
| 10     | 0.65 | 1.36 | 0.95 | 1.52 |
| 11     | 0.60 | 1.05 | 0.50 | 1.10 |
| 12     | 0.40 | 1.65 | 0.48 | 1.11 |
| 13     | 0.54 | 1.40 | 0.63 | 1.05 |
| 14     | 0.25 | 1.20 | 0.29 | 1.02 |
| 15     | 0.50 | 1.07 | 0.90 | 1.52 |
| 16     | 0.77 | 1.48 | 0.81 | 1.46 |
| 17     | 0.55 | 1.53 | 0.93 | 1.60 |
| 18     | 0.66 | 1.12 | 0.88 | 1.15 |
| 19     | 1.03 | 1.55 | 0.51 | 1.02 |
| 20     | 0.27 | 1.36 | 0.41 | 1.39 |
| 21     | 0.58 | 1.19 | 0.88 | 1.35 |
| 22     | 0.50 | 0.96 | 0.71 | 1.13 |
| 23     | 0.50 | 1.41 | 0.63 | 1.22 |
| 24     | 0.68 | 1.11 | 0.71 | 1.27 |
| 25     | 0.46 | 1.19 | 0.55 | 1.40 |
| 26     | 0.76 | 1.45 | 0.83 | 1.40 |
| 27     | 0.62 | 1.25 | 0.84 | 1.13 |
| 28     | 0.50 | 0.95 | 0.45 | 0.92 |
| 29     | 0.65 | 1.07 | 0.91 | 1.17 |
| 30     | 0.55 | 0.94 | 0.57 | 0.97 |

|    |      |      |      |      |
|----|------|------|------|------|
| 31 | 0.54 | 1.59 | 0.60 | 1.49 |
| 32 | 0.67 | 1.37 | 0.71 | 1.28 |
| 33 | 0.56 | 0.84 | 0.64 | 1.28 |
| 34 | 0.54 | 1.19 | 0.51 | 1.21 |
| 35 | 0.67 | 1.34 | 0.84 | 1.20 |
| 36 | 0.52 | 1.11 | 0.67 | 1.11 |
| 37 | 0.67 | 1.08 | 0.21 | 1.35 |
| 38 | 0.71 | 1.16 | 0.46 | 1.01 |
| 39 | 0.98 | 1.78 | 0.49 | 1.10 |
| 40 | 0.81 | 1.41 | 0.81 | 1.11 |
| 41 | 0.70 | 1.16 | 0.77 | 1.17 |
| 42 | 0.59 | 1.02 | 0.78 | 1.19 |
| 43 | 0.86 | 1.38 | 0.53 | 1.08 |
| 44 | 0.55 | 1.04 | 0.43 | 1.03 |
| 45 | 0.89 | 1.55 | 0.54 | 1.33 |
| 46 | 0.73 | 1.15 | 0.71 | 0.98 |
| 47 | 0.55 | 1.04 | 0.51 | 1.22 |
| 48 | 0.45 | 0.89 | 0.49 | 1.16 |
| 49 | 0.50 | 1.14 | 0.48 | 1.18 |
| 50 | 0.62 | 0.94 | 0.56 | 1.13 |
| 51 | 0.65 | 0.93 | 0.71 | 1.10 |
| 52 | 0.44 | 1.14 | 0.53 | 1.07 |
| 53 | 0.53 | 0.83 | 0.56 | 1.05 |
| 54 | 0.64 | 0.99 | 0.57 | 0.99 |
| 55 | 0.67 | 1.13 | 0.57 | 1.26 |
| 56 | 0.73 | 1.15 | 0.56 | 1.20 |
| 57 | 0.69 | 1.06 | 0.52 | 1.07 |
| 58 | 0.77 | 1.14 | 0.47 | 1.18 |
| 59 | 0.59 | 1.11 | 0.66 | 1.05 |
| 60 | 0.46 | 0.96 | 0.65 | 0.97 |
| 61 | 0.48 | 0.88 | 0.66 | 1.01 |
| 62 | 0.84 | 1.22 | 0.87 | 1.38 |
| 63 | 0.54 | 0.86 | 0.80 | 1.04 |

|    |      |      |      |      |
|----|------|------|------|------|
| 64 | 0.61 | 1.27 | 0.76 | 1.19 |
| 65 | 0.76 | 1.14 | 0.80 | 1.07 |
| 66 | 0.79 | 1.07 | 0.41 | 1.09 |
| 67 | 0.81 | 1.21 | 0.88 | 1.06 |
| 68 | 0.56 | 0.94 | 0.72 | 1.19 |
| 69 | 0.78 | 1.08 | 0.57 | 0.95 |
| 70 | 0.97 | 1.33 | 0.72 | 1.20 |
| 71 | 0.68 | 1.16 | 0.77 | 1.22 |
| 72 | 0.54 | 1.01 | 0.64 | 1.04 |
| 73 | 0.51 | 0.98 | 0.78 | 1.09 |
| 74 | 0.81 | 1.22 | 0.68 | 1.18 |
| 75 | 0.53 | 0.98 | 0.67 | 1.16 |
| 76 | 0.71 | 1.13 | 0.84 | 1.28 |
| 77 | 0.56 | 0.82 | 0.62 | 0.99 |
| 78 | 0.46 | 0.89 | 0.74 | 1.05 |
| 79 | 0.71 | 1.09 | 0.65 | 1.24 |
| 80 | 0.73 | 1.29 | 0.98 | 1.34 |
| 81 | 0.55 | 1.03 | 0.81 | 1.14 |
| 82 | 0.49 | 0.87 | 0.76 | 0.91 |
| 83 | 0.57 | 1.04 | 0.85 | 1.44 |
| 84 | 0.66 | 1.11 | 0.95 | 1.17 |
| 85 | 0.74 | 1.13 | 1.08 | 1.22 |
| 86 | 0.38 | 1.40 | 0.65 | 1.34 |
| 87 | 0.57 | 1.21 | 0.61 | 1.08 |
| 88 | 0.86 | 1.27 | 0.84 | 1.34 |
| 89 | 0.72 | 1.19 | 1.14 | 1.13 |
| 90 | 0.53 | 1.36 | 0.29 | 1.57 |
| 91 | 0.47 | 1.11 | 0.30 | 1.01 |
| 92 | 0.70 | 1.17 | 0.35 | 1.06 |

---

T-1, temporalis muscle thickness ratio; T-2, reconstructed temporalis muscle thickness ratio;  
V-1, temporalis muscle volume ratio; V-2, reconstructed temporalis muscle volume ratio
