# Supplementary material for: Cosmetic Reconstruction of Frontotemporal Depression Using Polyethylene Implant after Pterional Craniotomy
Source: Biomed Res Int. 2018 Oct 21;2018:1982726. doi: 10.1155/2018/1982726 (PMC6215591; doi:10.1155/2018/1982726)
Supplement: Supplementary Materials — S1 Table. The ratio of temporalis muscle thickness and volume of 92 patients. [file 1982726.f1.zip]

Archive with 3 entries (2 files):
- 1982726.f1/
- 1982726.f1/mat.1982726.v2.xlsx
- 1982726.f1/Pages from 1982726.v2.pdf
