# Supplementary material for: Cosmetic Reconstruction of Frontotemporal Depression Using Polyethylene Implant after Pterional Craniotomy
Source: Biomed Res Int. 2018 Oct 21;2018:1982726. doi: 10.1155/2018/1982726 (PMC6215591; doi:10.1155/2018/1982726)
Supplement: Supplementary Materials — S1 Table. The ratio of temporalis muscle thickness and volume of 92 patients. [file 1982726.f1.zip › 1982726.f1/mat.1982726.v2.xlsx]

## Sheet: Sheet1
등록번호	진단명	R	L	수술 접근법 (P/OZ)	Temporal muscle thickness	Depression (no. slight. marked)	Patients' satisfaction	face photo
09135218	O (14.6.30 ANGIO)	9.47 (3.67)	7.52
00480241	O (12.5.27)	11.24 (6.09)	15.44
00729559	X
09900348	x(10.3.20)
00378414	O (10.9.27)	R-4.63 / 6.71	L-11.93 / 9.37 (5.14)
00609360	O (13.6.15 CE ANGIO)	20.71	13.14 (5.92)
09634026	O (11.10.11)	R-14.49 /10.33	L-17.35 / 10.89 (4.17)
00748577	O (11.11.19)	R-11.32 / 8.94	L-12.51 / 10.71 (5.75)
09109001	O (14.12.10)	10.4	8.98 (2.28)
00755246	X (CT diffusion)
00358956	O (13.3.25)	10.41 (4.39)	9.85
00756712	O (13.4.18)	10.77 (5.49)	12.55
00751901	O (11.5.13)	11.11	15.10 (7.26)
00756551	O (14.5.13 ANGIO)	10.38 (5.92)	9.87
00757750	X
00410717	O (11.8.13)	11.04	11.31	muscle과 Medpor 구분 잘 안 됨
00630356	O (12.3.6 ANGIO)	13.22 (3.17)	8
09329324	O (12.12.17 ANGIO)	20.92 (8.12)	14.99
00556130	O (12.12.21)	9.33 (1.92)	7.78
09704034	O (11.12.13)	17.06	18.26 (8.51)
00732169	O (13.11.7 ANIGIO) BOTH	14.74 (7.7)	17.39 (9.27)
00767662	X (11.2)
08808932	O (12.2.1 NECK)	10.77	15.95 (8.3)
00743179	X
09921420	O (11.9.9)	9.6	14.68 (5.29)
00073661	O (14.6.10 ANGIO)	12.54	14.01 (8.3)
00781146	O (12.7.2 ANGIO)	12.46 (8.26)	11.04
00756717	O (11.11.18)	13.82 (2.73)	10.18
09035991	O (14.7.23)	12.92	15.33 (7.5)
00793181	X
09815793	O (14.1.9)	11.98	11.54 (6.03)
00792531	O (12.1.17)	12.9 (4.55)	9.14
09011814	O (12.4.3 ANGIO)	15.93	17.62 (10.82)
00717379	O (12.6.19 ANGIO)	9.59	11.40 (4.37)
00796745	O (11.12.1)	11.6	16.82 (8.87)
09523460	O (12.1.10)	12.79	15.95 (7.95)
00601608	O (12..9.10)	13.43 (7.10)	14.17
00801798	X
00623900	O (13.1.16 ANGIO)	14.25	15.28 (9.28)
00545354	O (14.1.3 ANGIO)	13.57 (7.98)	14.49
00805186	O (12.11.20 ANGIO)	6.8	10.82 (3.70)
09620847	O (13.5.18 ANGIO)	12.09	16.61 (8.05)
00809113	X
00598054	O (14.12.9 ANGIO)	10.34	8.68 (5.75)
08931070	X
00700443	O (12.3.13)	11.36	13.47 (6.12)
00751255	O (14.4.21 ANGIO)	10.69	14.30 (7.19)
00808301	O (12.9.25 ANGIO)	13.39 (6.28)	12.1
00811226	O (12.10.17 ANGIO)	12.4	13.33 (8.34)
09639186	O (14.10.23 ANGIO)	13.89 (8.48)	12.02
00386945	O (14.2.9 ANGIO)	9.04	16.06 (8.89)
00479170	O (13.1.14)	13.81 (7.90)	9.77
00797784	O (15.1.28 ANGIO)	11.6	13.51 (8.10)
00598940	O (12.5.18 ANGIO)	9.4	9.57 (5.51)
00816905	O (13.4.3 ANGIO) M 잘 안 보임	6.02	8.33 (5.16)
00372486	X
00591713	O (12.7.24) M 잘 안 보임	10.09	10.48 (5.57)
00819165	O (12.4.25) M X	7.7	11.92 (6.88)
09333412	O (13.12.23 ANGIO)	10.42 (6.68)	9.09
00725793	O (12.6.23) M X	8.79	9.1 (4.81)
00588654	X
00819157	O (12.5.4 ANGIO)	11.37 (5.76)	12.77
00716025	O (14.12.31 ANGIO)	9.22	10.52 (4.57)
00815322	O (13.4.1 ANGIO)	12.85 (8.47)	13.71
00823789	O (12.12.5 ANGIO)	12.35	11.46 (8.04)
09233363	O (12.12.13)	12.34 (4.81)	10.85
00827714	O (13.2.9 ANGIO)	14	11.59 (7.46)
00826202	O (14.4.28 ANGIO)	13.87 (8.97)	13.99
00380852	O (13.5.10 ANGIO)	12.81	14.43 (8.57)
00826851	x
00073538	O (14.5.8 ANGIO)	10.42	12.0 (7.59)
08812011	O (14.5.8 ANGIO)	14.58 (9.49)	13.78
00827601	O (12.11.12)	10.11	11.52 (7.81)
00811667	O (13.4.2)	8.53	9.51 (5.07)
00831248	X
00702160	O (12.9.25) M X	4.2	6.55
00832168	O (12.9.25) M X	6.5	4.2
00470331	O (13.6.14 ANGIO)	9.6 (4.57)	10.04
00834138	O (13.6.10 ANGIO)	12.48 (6.74)	14.12
09613880	O (13.7.8 ANGIO) M X	8.92	10.92 (7.45)
00365147	O (13.7.16 ANGIO) M X	12.10 (7.57)	14.04
00834443	O (13.5.22 ANGIO)	12.62	16.09 (7.73)
00830504	O (13.6.3 ANGIO) M X	9.49	10.85 (7.23)
09012544	X
00831622	O (14.7.26) M X	9.06	9.7 (7.17)
00838357	X
00838898	X
00354161	O (13.5.21 ANGIO)	17.27 (11.45)	14.22
08912150	O (13.12.10 ANGIO)	10.36	9.76 (5.75)
00644009	O (14.2.6 ANGIO)	15.23	16.51 (11.93)
00559704	O (13.8.24) BOTH	13.27 (9.70)	12.67 (10.01)
09021739	O (13.5.4 ANGIO)	10.61	14.09 (10.34)
00847867	O (13.5.4 ANGIO)
09001211	X
00620830	O (13.2.19 ANGIO)	13.85 (8.1)	11.97
00597529	O (13.10.14 ANGIO)	13.72	13.92 (7.37)
00380775	O (14.3.25 ANGIO)	13.5 (7.03)	13.77
00856041	O (14.3.26 ANGIO) M X	10.14	11.48
00716678	O (13.11.6 ANGIO)	10.44	12.74 (8.47)
00860849	O (14.1.16 ANGIO) M X	9.54 (5.14)	9.7
00861792	X
00580730	X
00868707	X
09037684	X
09815551	O (13.5.8 ANGIO)	14.74 (9.24)	13.09
09831839	X
09219090	O (14.3.25 ANGIO)	7.96 (5.44)	9.67
00864558	O (14.11.11 ANGIO)	11.23 (5.83)	12.61
00876679	X
00719839	O (14.6.12 ANGIO)	11.44 (7.46)	10.5
00774436	X
00372669	X
00873151	X
00881676	O (14.2.18 ANGIO)	12.32	15.95 (8.95)
00882436	O (14.3.11 ANGIO)	15.03 (10.30)	15.76
00882408	X
00456147	X
09014674	O (14.11.11 ANGIO)	11.25 (6.02)	10.88
00889690	X
00834447	X
00636279	O (14.6.14 ANGIO)	15.09	13.16 (7.38)
09435216	O (15.3.19 ANGIO)	15.91	16.48 (9.05)
00897284	X
00789900	X
00855626	O (14.7.7 ANGIO)	12.8 (7.63)	11.5
00472434	X
00894821	O (14.3.7 ANGIO)	7.65 (5.03)	6.77
00600245	X
00671869	O (14.10.21 ANGIO)	6.92	9.69 (2.6)
00913322	O (14.4.3 BCT)	11.4 (5.4)	9.4
00916512	O (14.12.11 BCT)	11.57	14.75 (9.92)
00916521	X
09416033	O (14.2.17 BCT)	11.85	14.14 (8.51)
00915877	O (14.12.31 BCT)	10.33 (4.06)	7.61
00919789	X
00921870	O (14.8.31 BCT)	12.43 (5.24)	11.15
00921497	X
00409912	O (15.3.13 ANGIO)	9.85 (5.92)	8.45
00936906	X
00936922	X
00941007	X
00940272	X
00948706	X
00965298	X
00101168	X
00969210	X
101168	O (2015.1.2 BCT)

## Sheet: Sheet2
number	unffected	T-1	T-2	V-1	V-2
1	1	0.488032	1.25931	0.769229	1.08659
2	1	0.39443	0.727979	0.880446	1.31331
3	1	0.766021	1.39642	1.17988	1.23529
4	1	0.285852	0.634476	0.538787	1.07186
5	1	0.403679	1.05421	0.729203	1.13456
6	1	0.643177	1.19799	0.686761	1.23616
7	1	0.219231	0.863462	0.780557	1.61738
8	1	0.445685	1.05685	0.529475	1.36554
9	1	0.43745	0.858167	0.624192	0.880206
10	1	0.653465	1.35914	0.954328	1.51699
11	1	0.599797	1.05167	0.497252	1.10058						대응표본 통계
12	1	0.39625	1.6525	0.477361	1.11038								평균	N	표준 편차	표준 오차 평균
13	1	0.541694	1.3956	0.632404	1.05481						쌍 1	Pre-T	0.608677	92	0.157556	0.0164264
14	1	0.246787	1.19923	0.287653	1.02226							Post-T	1.1459	92	0.211094	0.0220081
15	1	0.498828	1.07034	0.898935	1.52044						쌍 2	Pre-V	0.671617	92	0.187443	0.0195423
16	1	0.770659	1.48097	0.807581	1.45763							Post-V	1.18011	92	0.160573	0.0167409
17	1	0.551042	1.52917	0.927493	1.59547
18	1	0.661882	1.11722	0.884453	1.1499
19	1	1.02736	1.54975	0.511144	1.02252						대응표본 상관
20	1	0.268173	1.35756	0.414995	1.39148								N	상관	유의수준
21	1	0.580495	1.18653	0.884849	1.3466						쌍 1	Pre-T & Post-T	92	0.448677	7.27103e-06
22	1	0.503339	0.963272	0.708116	1.12855						쌍 2	Pre-V & Post-V	92	0.252475	0.0151816
23	1	0.497812	1.41138	0.633759	1.2195
24	1	0.679222	1.10609	0.707278	1.26805
25	1	0.455683	1.18874	0.547651	1.40346						대응표본 검정
26	1	0.764655	1.45	0.826907	1.39668								대응 차이					t	df	유의수준(양쪽)
27	1	0.621579	1.24707	0.836997	1.12504								평균	표준 편차	표준 오차 평균	차이의 95% 신뢰구간
28	1	0.501059	0.947777	0.445064	0.923049											하한	상한
29	1	0.651228	1.07228	0.913149	1.16624						쌍 1	Pre-T - Post-T	-0.537221	0.198845	0.020731	-0.578401	-0.496041	-25.9139	91	8.74869e-44
30	1	0.550725	0.936508	0.568068	0.973488						쌍 2	Pre-V - Post-V	-0.508496	0.213823	0.0222926	-0.552777	-0.464214	-22.8101	91	2.07616e-39
31	1	0.544118	1.59118	0.601792	1.48846
32	1	0.66584	1.37386	0.714579	1.28361
33	1	0.556093	0.839458	0.636461	1.2789
34	1	0.538732	1.18574	0.507899	1.21026
35	1	0.672591	1.3377	0.838178	1.19867
36	1	0.519008	1.10661	0.666169	1.10617
37	1	0.672581	1.075	0.207451	1.35424
38	1	0.705491	1.15557	0.458462	1.01389
39	1	0.983407	1.77655	0.487876	1.09662
40	1	0.808598	1.41351	0.808027	1.11127
41	1	0.698276	1.16466	0.771799	1.17454
42	1	0.58617	1.01809	0.782109	1.18937
43	1	0.857143	1.38372	0.530021	1.08372
44	1	0.552032	1.03865	0.433109	1.03027
45	1	0.893506	1.54805	0.541162	1.33037
46	1	0.734873	1.14631	0.710173	0.978811
47	1	0.547213	1.03527	0.505528	1.2211
48	1	0.451057	0.890368	0.492213	1.16308
49	1	0.495662	1.141	0.476327	1.1756
50	1	0.617797	0.937272	0.563954	1.1323
51	1	0.651012	0.927935	0.710116	1.09929
52	1	0.443318	1.13733	0.533454	1.06951
53	1	0.532857	0.827857	0.557646	1.05233
54	1	0.641172	0.991422	0.565338	0.993334
55	1	0.669009	1.12646	0.569853	1.25548
56	1	0.728407	1.15163	0.564322	1.19823
57	1	0.688679	1.05806	0.521002	1.06858
58	1	0.772502	1.13947	0.472166	1.18442
59	1	0.594373	1.11489	0.656196	1.04796
60	1	0.455179	0.956175	0.653431	0.970527
61	1	0.477337	0.883853	0.66258	1.00964
62	1	0.835202	1.22422	0.865605	1.37512
63	1	0.539174	0.861823	0.800572	1.04128
64	1	0.61252	1.27496	0.760378	1.18642
65	1	0.761855	1.14331	0.798973	1.07469
66	1	0.791391	1.07064	0.408447	1.0914
67	1	0.805204	1.21449	0.875517	1.0633
68	1	0.555019	0.942085	0.715792	1.19399
69	1	0.783322	1.08404	0.568036	0.945757
70	1	0.974552	1.32799	0.72034	1.20064
71	1	0.676692	1.15706	0.769444	1.21677
72	1	0.537172	1.01458	0.643363	1.0402
73	1	0.51053	0.980392	0.780385	1.08726
74	1	0.811303	1.22031	0.681511	1.17616
75	1	0.529897	0.983505	0.666212	1.15947
76	1	0.705882	1.12605	0.842691	1.28457
77	1	0.562565	0.823164	0.624392	0.994088
78	1	0.462331	0.890563	0.736503	1.05247
79	1	0.710476	1.08952	0.64515	1.23548
80	1	0.726461	1.29464	0.975553	1.34057
81	1	0.553309	1.03401	0.809009	1.14494
82	1	0.489066	0.872101	0.759918	0.9136
83	1	0.568825	1.03583	0.84818	1.43545
84	1	0.663478	1.11304	0.946635	1.16935
85	1	0.742984	1.12999	1.0816	1.21664
86	1	0.375723	1.40029	0.651314	1.33795
87	1	0.574468	1.21277	0.608784	1.08211
88	1	0.85739	1.27485	0.843605	1.33874
89	1	0.718143	1.19325	1.13546	1.13358
90	1	0.533509	1.35742	0.294921	1.57048
91	1	0.469955	1.1148	0.301568	1.00545
92	1	0.700592	1.16568	0.345527	1.05782
